# Supplementary material for: The Differential Effects of First-Person and Third-Person Motor Imagery on Anxiety and Psychological Readiness in Athletes Recovering from ACL Reconstruction: A Longitudinal Study
Source: Research Square preprint supplement (doi:10.21203/rs.3.rs-7751825/v1), 2025-11-15
Supplement: Supplementary file 1 [file 97040c79c3154a7eb29493f8.xlsx]

## Sheet: Sheet1
Time Point	First-Person Imagery (VMIQ-2)	Third-Person Imagery (VMIQ-2)	Psychological Readiness (ACL-RSI)	Anxiety Level (STAI)
Baseline	16	25	43	47
Baseline	23	24	52	28
Baseline	19	25	54	50
Baseline	22	42	51	51
Baseline	17	36	62	32
Baseline	29	29	58	62
Baseline	14	20	61	49
Baseline	27	28	64	53
Baseline	23	15	49	52
Baseline	20	25	67	46
Baseline	23	26	63	29
Baseline	23	11	52	34
Baseline	26	34	66	49
Baseline	30	25	49	23
Baseline	27	30	46	36
Baseline	18	23	59	60
Baseline	34	27	54	30
Baseline	25	26	77	45
Baseline	29	16	49	52
Baseline	19	38	47	54
Baseline	26	32	71	50
Baseline	19	27	79	41
Baseline	26	33	38	27
Baseline	19	42	54	49
Baseline	31	33	50	58
Baseline	23	28	69	54
Baseline	20	36	61	38
Baseline	15	24	52	47
Baseline	24	34	90	36
Baseline	27	28	50	52
Baseline	19	31	72	37
Baseline	29	25	48	34
Baseline	24	26	49	33
Baseline	35	21	41	41
Baseline	17	28	72	31
Baseline	13	29	74	42
Baseline	20	34	50	43
Baseline	17	31	39	19
Baseline	14	28	41	21
Baseline	32	19	65	47
Baseline	12	30	69	30
Baseline	12	38	49	33
Baseline	23	18	59	45
Baseline	9	27	44	28
Baseline	21	24	53	42
Baseline	24	30	44	41
Baseline	20	18	59	36
Baseline	25	27	60	53
Baseline	29	26	57	32
Baseline	31	45	63	39
Baseline	19	29	47	48
Baseline	21	20	77	40
Baseline	13	33	72	38
Baseline	29	49	53	47
Baseline	15	44	51	43
Baseline	18	33	31	48
Baseline	21	33	68	24
Baseline	30	23	30	54
Baseline	28	21	52	35
Baseline	29	40	58	41
Baseline	18	27	70	44
Baseline	31	39	74	39
Baseline	19	31	42	48
Baseline	25	27	82	58
Baseline	22	18	61	34
Baseline	32	26	65	46
Baseline	12	32	51	30
Baseline	26	32	62	43
Baseline	21	28	66	33
Baseline	18	36	85	62
Baseline	13	9	47	40
Baseline	20	31	41	46
Baseline	19	23	62	33
Baseline	27	32	52	46
Baseline	20	27	86	45
Baseline	18	26	48	56
Baseline	17	31	65	42
Baseline	25	32	34	38
Baseline	11	16	47	38
Baseline	15	36	56	27
Baseline	25	32	72	33
Baseline	18	32	67	39
Baseline	13	32	66	57
Baseline	21	23	32	45
Baseline	23	41	64	48
Baseline	14	26	41	38
Baseline	18	38	54	37
Baseline	27	36	51	46
Baseline	22	26	72	46
Baseline	34	38	58	31
Baseline	28	35	40	34
Baseline	26	28	77	47
Baseline	25	26	49	30
Baseline	20	36	67	41
Baseline	39	30	70	28
Baseline	21	23	51	25
Baseline	24	24	40	33
Baseline	23	21	46	49
Baseline	11	26	50	36
Baseline	26	30	44	41
3 months	20	29	64	38
3 months	18	16	63	22
3 months	26	23	44	43
3 months	23	28	70	32
3 months	26	20	50	22
3 months	11	30	63	37
3 months	24	24	58	39
3 months	25	27	60	35
3 months	18	38	67	46
3 months	21	27	83	37
3 months	17	18	73	48
3 months	12	12	61	19
3 months	15	31	79	28
3 months	8	29	44	52
3 months	9	24	74	56
3 months	11	25	60	46
3 months	18	34	47	44
3 months	23	24	60	54
3 months	21	40	42	20
3 months	14	27	57	30
3 months	16	19	76	31
3 months	15	28	73	43
3 months	20	43	75	37
3 months	11	25	49	36
3 months	19	18	68	36
3 months	10	25	56	35
3 months	18	22	43	35
3 months	15	32	75	46
3 months	20	16	82	45
3 months	11	15	61	33
3 months	23	30	38	47
3 months	29	34	71	31
3 months	16	33	71	25
3 months	12	29	48	57
3 months	21	21	62	45
3 months	19	26	44	34
3 months	23	14	50	29
3 months	24	28	72	25
3 months	28	14	49	30
3 months	27	37	81	41
3 months	21	24	43	43
3 months	28	29	46	36
3 months	20	31	61	40
3 months	13	29	86	40
3 months	15	23	79	25
3 months	14	30	71	30
3 months	19	21	43	41
3 months	17	41	82	43
3 months	22	18	70	52
3 months	11	38	41	23
3 months	12	38	66	42
3 months	16	19	64	49
3 months	17	32	74	33
3 months	19	24	57	43
3 months	4	25	65	28
3 months	21	34	73	45
3 months	9	19	53	37
3 months	29	20	52	44
3 months	15	22	75	40
3 months	20	15	57	37
3 months	26	19	78	36
3 months	14	17	60	22
3 months	21	31	79	33
3 months	22	22	65	29
3 months	21	24	61	46
3 months	16	25	71	46
3 months	19	20	64	32
3 months	28	28	60	35
3 months	19	12	41	33
3 months	19	21	85	23
3 months	21	26	67	64
3 months	26	19	68	54
3 months	12	20	56	26
3 months	23	30	87	34
3 months	25	25	58	26
3 months	19	29	69	27
3 months	18	26	68	47
3 months	8	20	60	39
3 months	21	25	82	31
3 months	20	20	41	51
3 months	27	43	62	30
3 months	17	23	72	44
3 months	12	23	60	33
3 months	12	22	69	50
3 months	12	25	41	48
3 months	23	29	52	33
3 months	22	37	61	43
3 months	15	11	73	24
3 months	20	24	62	31
3 months	18	34	64	48
3 months	19	25	68	35
3 months	12	25	65	40
3 months	8	28	79	32
3 months	22	9	65	32
3 months	21	23	50	24
3 months	14	20	79	50
3 months	14	24	75	33
3 months	17	19	79	39
3 months	18	29	54	59
3 months	24	27	67	35
6 months	15	34	62	33
6 months	20	17	71	30
6 months	17	24	76	37
6 months	17	22	88	33
6 months	19	24	74	18
6 months	26	24	56	18
6 months	19	27	74	40
6 months	16	17	62	30
6 months	22	23	83	42
6 months	10	19	63	33
6 months	23	15	63	37
6 months	10	17	67	26
6 months	20	21	79	27
6 months	18	32	87	36
6 months	22	28	72	52
6 months	23	19	64	32
6 months	8	14	70	38
6 months	22	27	75	29
6 months	1	21	84	36
6 months	20	21	70	31
6 months	11	21	68	34
6 months	17	21	58	33
6 months	6	28	72	45
6 months	15	7	81	22
6 months	14	23	69	33
6 months	15	16	71	22
6 months	19	23	91	41
6 months	20	23	73	40
6 months	14	26	64	34
6 months	20	27	74	40
6 months	19	19	81	32
6 months	19	11	72	43
6 months	10	27	84	11
6 months	3	30	62	38
6 months	14	21	80	40
6 months	15	17	61	27
6 months	14	20	58	34
6 months	20	17	65	34
6 months	11	27	71	24
6 months	15	24	69	26
6 months	17	29	105	38
6 months	26	12	47	43
6 months	17	27	93	37
6 months	22	32	66	43
6 months	22	28	66	42
6 months	10	19	66	22
6 months	17	21	86	41
6 months	15	24	73	40
6 months	4	30	58	30
6 months	19	42	57	46
6 months	19	27	62	23
6 months	7	24	67	41
6 months	17	23	74	39
6 months	17	22	66	40
6 months	18	28	74	31
6 months	22	16	71	39
6 months	11	27	80	54
6 months	21	16	70	18
6 months	23	19	71	38
6 months	19	26	74	30
6 months	22	18	58	24
6 months	14	24	70	34
6 months	22	22	80	32
6 months	9	16	79	32
6 months	14	15	70	30
6 months	10	22	85	44
6 months	13	24	81	26
6 months	11	42	80	34
6 months	17	15	67	37
6 months	13	19	65	45
6 months	9	30	67	34
6 months	8	26	68	37
6 months	24	6	74	19
6 months	14	20	66	27
6 months	18	22	64	42
6 months	9	23	76	18
6 months	13	21	74	18
6 months	13	29	60	30
6 months	27	27	71	39
6 months	6	15	87	44
6 months	23	17	80	54
6 months	11	18	71	34
6 months	20	21	75	22
6 months	16	16	63	34
6 months	14	15	81	38
6 months	23	16	77	28
6 months	13	25	83	40
6 months	10	19	57	36
6 months	21	32	71	23
6 months	7	18	68	26
6 months	22	29	81	24
6 months	15	29	71	26
6 months	16	19	68	41
6 months	17	34	66	41
6 months	8	26	48	36
6 months	10	22	60	39
6 months	15	30	76	31
6 months	10	24	61	39
6 months	11	21	73	43
6 months	11	22	69	39
9 months	15	24	86	21
9 months	14	16	91	27
9 months	8	29	70	40
9 months	9	18	81	34
9 months	8	27	69	16
9 months	20	28	67	43
9 months	17	16	73	47
9 months	18	25	87	44
9 months	9	20	81	44
9 months	10	18	87	36
9 months	15	19	73	25
9 months	13	14	81	27
9 months	8	18	82	45
9 months	10	26	84	22
9 months	17	10	71	31
9 months	18	25	61	21
9 months	20	18	76	27
9 months	17	21	71	32
9 months	13	26	93	41
9 months	5	25	77	18
9 months	15	18	83	24
9 months	10	17	86	39
9 months	16	16	85	39
9 months	13	18	88	28
9 months	16	18	79	26
9 months	14	24	93	38
9 months	16	18	80	19
9 months	18	15	78	28
9 months	17	9	82	36
9 months	22	36	70	35
9 months	8	23	66	34
9 months	6	20	80	30
9 months	0	22	64	26
9 months	11	21	77	23
9 months	14	13	88	39
9 months	15	20	80	37
9 months	8	18	74	37
9 months	11	15	83	24
9 months	9	29	79	22
9 months	8	13	82	23
9 months	11	24	92	38
9 months	14	12	83	34
9 months	14	19	81	33
9 months	10	16	82	42
9 months	4	18	64	30
9 months	10	18	73	39
9 months	14	12	84	38
9 months	19	29	77	20
9 months	12	26	83	36
9 months	9	23	75	19
9 months	16	27	66	43
9 months	16	22	75	11
9 months	25	12	69	41
9 months	9	6	87	33
9 months	16	18	92	33
9 months	5	24	81	35
9 months	15	20	62	30
9 months	7	18	58	34
9 months	7	19	79	27
9 months	9	16	86	33
9 months	19	16	75	56
9 months	10	30	71	33
9 months	23	14	75	30
9 months	8	16	80	22
9 months	20	9	84	18
9 months	17	29	60	28
9 months	7	27	73	31
9 months	23	24	70	24
9 months	16	25	76	26
9 months	10	19	80	34
9 months	14	30	61	23
9 months	5	14	63	29
9 months	10	19	76	33
9 months	16	12	77	23
9 months	17	27	76	37
9 months	17	27	81	29
9 months	6	23	73	27
9 months	13	15	63	33
9 months	7	28	89	11
9 months	11	26	74	31
9 months	13	16	89	31
9 months	6	18	86	36
9 months	24	25	82	27
9 months	18	21	74	27
9 months	15	16	60	23
9 months	22	23	97	41
9 months	16	18	59	36
9 months	17	28	80	32
9 months	4	21	83	34
9 months	14	24	68	36
9 months	14	16	75	28
9 months	12	13	80	19
9 months	19	21	70	27
9 months	22	29	85	29
9 months	14	28	74	24
9 months	16	10	85	31
9 months	11	27	73	29
9 months	15	26	79	28
9 months	15	27	72	33
9 months	10	22	80	26
